# Supplementary material
Source: publisher figshare collection journal article supplement (https://gsajournals.figshare.com/ndownloader/files/22616540)
Supplement: Supplementary file 1 [file 22616540]

Date	Treatment	Tube.label	PCR plate colum	PCR plate row	Sex	Infected	Researcher	wolbachia	host
20191213	L42	L42-1	11	A	M	I	PHN	L42	L42
20191213	L42	L42-1	12	A	F	I	PHN	L42	L42
20191213	L42	L42-1	1	B	F	I	PHN	L42	L42
20191213	L42	L42-1	2	B	F	I	PHN	L42	L42
20191213	L42	L42-1	3	B	M	I	PHN	L42	L42
20191213	L42	L42-1	4	B	M	I	PHN	L42	L42
20191213	L42	L42-1	5	B	F	I	PHN	L42	L42
20191213	L42	L42-1	6	B	F	I	PHN	L42	L42
20191213	L42	L42-1	7	B	M	I	PHN	L42	L42
20191213	L42	L42-1	8	B	F	I	PHN	L42	L42
20191213	L42	L42-16	9	B	F	I	PHN	L42	L42
20191213	L42	L42-16	10	B	F	I	PHN	L42	L42
20191213	L42	L42-16	11	B	F	I	PHN	L42	L42
20191213	L42	L42-16	12	B	F	I	PHN	L42	L42
20191213	L42	L42-16	1	C	F	I	PHN	L42	L42
20191213	L42	L42-16	2	C	M	I	PHN	L42	L42
20191213	L42	L42-16	3	C	F	I	PHN	L42	L42
20191213	L42	L42-16	4	C	M	I	PHN	L42	L42
20191213	L42	L42-16	5	C	M	I	PHN	L42	L42
20191213	L42	L42-16	6	C	M	I	PHN	L42	L42
20191213	L42	L42-17	7	C	F	I	PHN	L42	L42
20191213	L42	L42-17	8	C	F	I	PHN	L42	L42
20191213	L42	L42-17	9	C	F	I	PHN	L42	L42
20191213	L42	L42-17	10	C	F	I	PHN	L42	L42
20191213	L42	L42-17	11	C	F	I	PHN	L42	L42
20191213	L42	L42-17	12	C	M	I	PHN	L42	L42
20191213	L42	L42-17	1	D	M	I	PHN	L42	L42
20191213	L42	L42-17	2	D	M	I	PHN	L42	L42
20191213	L42	L42-17	3	D	M	I	PHN	L42	L42
20191213	L42	L42-17	4	D	M	I	PHN	L42	L42
20191213	L42	L42-24	5	D	F	I	PHN	L42	L42
20191213	L42	L42-24	6	D	F	I	PHN	L42	L42
20191217	L42	L42-24	7	D	F	I	PHN	L42	L42
20191217	L42	L42-24	8	D	F	I	PHN	L42	L42
20191217	L42	L42-24	9	D	F	I	PHN	L42	L42
20191217	L42	L42-24	10	D	M	I	PHN	L42	L42
20191217	L42	L42-24	11	D	M	I	PHN	L42	L42
20191217	L42	L42-24	12	D	M	I	PHN	L42	L42
20191217	L42	L42-24	1	E	M	I	PHN	L42	L42
20191217	L42	L42-24	2	E	M	I	PHN	L42	L42
20191217	L42	L42-25	3	E	F	U	PHN	L42	L42
20191217	L42	L42-25	4	E	F	I	PHN	L42	L42
20191217	L42	L42-25	5	E	F	I	PHN	L42	L42
20191217	L42	L42-25	6	E	F	I	PHN	L42	L42
20191217	L42	L42-25	7	E	F	U	PHN	L42	L42
20191217	L42	L42-25	8	E	M	I	PHN	L42	L42
20191217	L42	L42-25	9	E	M	I	PHN	L42	L42
20191217	L42	L42-25	10	E	M	I	PHN	L42	L42
20191217	L42	L42-25	11	E	M	I	PHN	L42	L42
20191217	L42	L42-25	12	E	M	I	PHN	L42	L42
20191217	L42	L42-35	1	F	F	I	PHN	L42	L42
20191217	L42	L42-35	2	F	F	I	PHN	L42	L42
20191217	L42	L42-35	3	F	F	I	PHN	L42	L42
20191217	L42	L42-35	4	F	F	I	PHN	L42	L42
20191217	L42	L42-35	5	F	F	I	PHN	L42	L42
20191217	L42	L42-35	6	F	M	I	PHN	L42	L42
20191217	L42	L42-35	7	F	M	I	PHN	L42	L42
20191217	L42	L42-35	8	F	M	I	PHN	L42	L42
20191217	L42	L42-35	9	F	M	I	PHN	L42	L42
20191217	L42	L42-35	10	F	M	I	PHN	L42	L42
20191217	L42	L42-39	11	F	F	I	PHN	L42	L42
20191217	L42	L42-39	12	F	F	I	PHN	L42	L42
20191217	L42	L42-39	1	G	F	I	PHN	L42	L42
20191217	L42	L42-39	2	G	F	I	PHN	L42	L42
20191217	L42	L42-39	3	G	F	I	PHN	L42	L42
20191217	L42	L42-39	4	G	M	I	PHN	L42	L42
20191217	L42	L42-39	5	G	M	I	PHN	L42	L42
20191217	L42	L42-39	6	G	M	I	PHN	L42	L42
20191217	L42	L42-39	7	G	M	I	PHN	L42	L42
20191217	L42	L42-39	8	G	M	I	PHN	L42	L42
20191217	L42	L42-45	9	G	F	I	PHN	L42	L42
20191217	L42	L42-45	10	G	F	I	PHN	L42	L42
20191217	L42	L42-45	11	G	F	I	PHN	L42	L42
20191217	L42	L42-45	12	G	F	I	PHN	L42	L42
20191217	L42	L42-45	1	H	F	I	PHN	L42	L42
20191217	L42	L42-45	2	H	M	I	PHN	L42	L42
20191217	L42	L42-45	3	H	M	I	PHN	L42	L42
20191217	L42	L42-45	4	H	M	I	PHN	L42	L42
20191217	L42	L42-45	5	H	M	I	PHN	L42	L42
20191217	L42	L42-45	6	H	M	I	PHN	L42	L42
20191217	L42	L42-50	7	H	F	I	PHN	L42	L42
20191217	L42	L42-50	8	H	F	I	PHN	L42	L42
20191217	L42	L42-50	9	H	M	I	PHN	L42	L42
20191217	L42_L48	L42_L48-2	1	A	F	I	MTJH	L42	L48
20191217	L42_L48	L42_L48-2	1	B	F	I	MTJH	L42	L48
20191217	L42_L48	L42_L48-2	1	C	F	I	MTJH	L42	L48
20191217	L42_L48	L42_L48-2	1	D	F	I	MTJH	L42	L48
20191217	L42_L48	L42_L48-2	1	E	F	NA	MTJH	L42	L48
20191217	L42_L48	L42_L48-2	1	F	M	I	MTJH	L42	L48
20191217	L42_L48	L42_L48-2	1	G	M	I	MTJH	L42	L48
20191217	L42_L48	L42_L48-2	1	H	M	I	MTJH	L42	L48
20191217	L42_L48	L42_L48-2	2	A	M	I	MTJH	L42	L48
20191217	L42_L48	L42_L48-2	2	B	M	I	MTJH	L42	L48
20191217	L42_L48	L42_L48-3	2	C	F	I	MTJH	L42	L48
20191217	L42_L48	L42_L48-3	2	D	F	I	MTJH	L42	L48
20191217	L42_L48	L42_L48-3	2	E	F	I	MTJH	L42	L48
20191217	L42_L48	L42_L48-3	2	F	F	I	MTJH	L42	L48
20191217	L42_L48	L42_L48-3	2	G	F	I	MTJH	L42	L48
20191217	L42_L48	L42_L48-3	2	H	M	I	MTJH	L42	L48
20191217	L42_L48	L42_L48-3	3	A	M	I	MTJH	L42	L48
20191217	L42_L48	L42_L48-3	3	B	M	I	MTJH	L42	L48
20191217	L42_L48	L42_L48-3	3	C	M	I	MTJH	L42	L48
20191217	L42_L48	L42_L48-3	3	D	M	I	MTJH	L42	L48
20191217	L42_L48	L42_L48-4	3	E	F	I	MTJH	L42	L48
20191217	L42_L48	L42_L48-4	3	F	F	I	MTJH	L42	L48
20191217	L42_L48	L42_L48-4	3	G	F	I	MTJH	L42	L48
20191217	L42_L48	L42_L48-4	3	H	F	I	MTJH	L42	L48
20191217	L42_L48	L42_L48-4	4	A	F	I	MTJH	L42	L48
20191217	L42_L48	L42_L48-4	4	B	M	I	MTJH	L42	L48
20191217	L42_L48	L42_L48-4	4	C	M	I	MTJH	L42	L48
20191217	L42_L48	L42_L48-4	4	D	M	I	MTJH	L42	L48
20191217	L42_L48	L42_L48-4	4	E	M	I	MTJH	L42	L48
20191217	L42_L48	L42_L48-5	4	F	F	I	MTJH	L42	L48
20191217	L42_L48	L42_L48-5	4	G	F	I	MTJH	L42	L48
20191217	L42_L48	L42_L48-5	4	H	F	I	MTJH	L42	L48
20191217	L42_L48	L42_L48-5	5	A	F	I	MTJH	L42	L48
20191217	L42_L48	L42_L48-5	5	B	F	I	MTJH	L42	L48
20191217	L42_L48	L42_L48-4	5	C	M	I	MTJH	L42	L48
20191217	L42_L48	L42_L48-5	5	D	F	I	MTJH	L42	L48
20191217	L42_L48	L42_L48-5	5	E	M	I	MTJH	L42	L48
20191217	L42_L48	L42_L48-5	5	F	M	I	MTJH	L42	L48
20191217	L42_L48	L42_L48-5	5	G	M	I	MTJH	L42	L48
20191217	L42_L48	L42_L48-5	5	H	M	I	MTJH	L42	L48
20191217	L42_L48	L42_L48-6	6	A	F	I	MTJH	L42	L48
20191217	L42_L48	L42_L48-6	6	B	F	I	MTJH	L42	L48
20191217	L42_L48	L42_L48-6	6	C	F	I	MTJH	L42	L48
20191217	L42_L48	L42_L48-6	6	D	F	I	MTJH	L42	L48
20191217	L42_L48	L42_L48-6	6	E	F	I	MTJH	L42	L48
20191217	L42_L48	L42_L48-6	6	F	M	I	MTJH	L42	L48
20191217	L42_L48	L42_L48-6	6	G	M	I	MTJH	L42	L48
20191217	L42_L48	L42_L48-6	6	H	M	I	MTJH	L42	L48
20191217	L42_L48	L42_L48-6	7	A	M	I	MTJH	L42	L48
20191217	L42_L48	L42_L48-6	7	B	M	I	MTJH	L42	L48
20191217	L42_L48	L42_L48-8	7	C	F	I	MTJH	L42	L48
20191217	L42_L48	L42_L48-8	7	D	F	I	MTJH	L42	L48
20191217	L42_L48	L42_L48-8	7	E	F	I	MTJH	L42	L48
20191217	L42_L48	L42_L48-8	7	F	F	I	MTJH	L42	L48
20191217	L42_L48	L42_L48-8	7	G	F	I	MTJH	L42	L48
20191217	L42_L48	L42_L48-8	7	H	M	I	MTJH	L42	L48
20191217	L42_L48	L42_L48-8	8	A	M	I	MTJH	L42	L48
20191217	L42_L48	L42_L48-8	8	B	M	I	MTJH	L42	L48
20191217	L42_L48	L42_L48-8	8	C	M	I	MTJH	L42	L48
20191217	L42_L48	L42_L48-8	8	D	M	I	MTJH	L42	L48
20191217	L42_L48	L42_L48-9	8	E	F	I	MTJH	L42	L48
20191217	L42_L48	L42_L48-9	8	F	F	U	MTJH	L42	L48
20191217	L42_L48	L42_L48-9	8	G	F	I	MTJH	L42	L48
20191217	L42_L48	L42_L48-9	8	H	F	I	MTJH	L42	L48
20191217	L42_L48	L42_L48-9	9	A	F	I	MTJH	L42	L48
20191217	L42_L48	L42_L48-9	9	B	M	I	MTJH	L42	L48
20191217	L42_L48	L42_L48-9	9	C	M	I	MTJH	L42	L48
20191217	L42_L48	L42_L48-9	9	D	M	I	MTJH	L42	L48
20191217	L42_L48	L42_L48-9	9	E	M	I	MTJH	L42	L48
20191217	L42_L48	L42_L48-9	9	F	M	I	MTJH	L42	L48
20191217	L42_L48	L42_L48-11	9	G	F	I	MTJH	L42	L48
20191217	L42_L48	L42_L48-11	9	H	F	I	MTJH	L42	L48
20191217	L42_L48	L42_L48-11	10	A	F	I	MTJH	L42	L48
20191217	L42_L48	L42_L48-11	10	B	F	I	MTJH	L42	L48
20191217	L42_L48	L42_L48-11	10	C	F	I	MTJH	L42	L48
20191217	L42_L48	L42_L48-11	10	D	M	I	MTJH	L42	L48
20191217	L42_L48	L42_L48-11	10	E	M	I	MTJH	L42	L48
20191217	L42_L48	L42_L48-11	10	F	M	I	MTJH	L42	L48
20191217	L42_L48	L42_L48-11	10	G	M	I	MTJH	L42	L48
20191217	L42_L48	L42_L48-11	10	H	M	I	MTJH	L42	L48
20191217	L42_L48	L42_L48-12	11	A	F	I	MTJH	L42	L48
20191217	L42_L48	L42_L48-12	11	B	F	I	MTJH	L42	L48
20191217	L42_L48	L42_L48-12	11	C	F	I	MTJH	L42	L48
20191217	L42_L48	L42_L48-12	11	D	F	I	MTJH	L42	L48
20191217	L42_L48	L42_L48-12	11	E	F	I	MTJH	L42	L48
20191217	L42_L48	L42_L48-12	11	F	M	I	MTJH	L42	L48
20191217	L42_L48	L42_L48-12	11	G	M	I	MTJH	L42	L48
20191217	L42_L48	L42_L48-12	11	H	M	I	MTJH	L42	L48
20191217	L42_L48	L42_L48-12	12	A	M	I	MTJH	L42	L48
20191217	L42_L48	L42_L48-12	12	B	M	I	MTJH	L42	L48
20191217	L42_L48	L42_L48-13	12	C	F	I	MTJH	L42	L48
20191217	L42_L48	L42_L48-13	12	D	M	I	MTJH	L42	L48
20191217	L42_L48	L42_L48-13	12	E	M	I	MTJH	L42	L48
20191217	L42_L48	L42_L48-13	1	A	F	I	MTJH	L42	L48
20191217	L42_L48	L42_L48-13	1	B	F	I	MTJH	L42	L48
20191217	L42_L48	L42_L48-13	1	C	F	I	MTJH	L42	L48
20191217	L42_L48	L42_L48-13	1	D	M	I	MTJH	L42	L48
20191217	L42_L48	L42_L48-13	1	E	M	I	MTJH	L42	L48
20191217	L42_L48	L42_L48-13	1	F	M	I	MTJH	L42	L48
20191217	L42_L48	L42_L48-13	1	G	M	I	MTJH	L42	L48
20191217	L42_L48	L42_L48-14	1	H	F	I	MTJH	L42	L48
20191217	L42_L48	L42_L48-14	2	A	F	I	MTJH	L42	L48
20191217	L42_L48	L42_L48-14	2	B	F	I	MTJH	L42	L48
20191217	L42_L48	L42_L48-14	2	C	F	I	MTJH	L42	L48
20191217	L42_L48	L42_L48-14	2	D	F	I	MTJH	L42	L48
20191217	L42_L48	L42_L48-14	2	E	M	I	MTJH	L42	L48
20191217	L42_L48	L42_L48-14	2	F	M	I	MTJH	L42	L48
20191217	L42_L48	L42_L48-14	2	G	M	I	MTJH	L42	L48
20191217	L42_L48	L42_L48-14	2	H	M	I	MTJH	L42	L48
20191217	L42_L48	L42_L48-14	3	A	M	I	MTJH	L42	L48
20191217	L42_L48	L42_L48-16	3	B	F	I	MTJH	L42	L48
20191217	L42_L48	L42_L48-16	3	C	F	I	MTJH	L42	L48
20191217	L42_L48	L42_L48-16	3	D	F	I	MTJH	L42	L48
20191217	L42_L48	L42_L48-16	3	E	F	I	MTJH	L42	L48
20191217	L42_L48	L42_L48-16	3	F	F	I	MTJH	L42	L48
20191217	L42_L48	L42_L48-16	3	G	M	I	MTJH	L42	L48
20191217	L42_L48	L42_L48-16	3	H	M	I	MTJH	L42	L48
20191217	L42_L48	L42_L48-16	4	A	M	I	MTJH	L42	L48
20191217	L42_L48	L42_L48-16	4	B	M	I	MTJH	L42	L48
20191217	L42_L48	L42_L48-16	4	C	M	I	MTJH	L42	L48
20191217	L42_L48	L42_L48-17	4	D	F	I	MTJH	L42	L48
20191217	L42_L48	L42_L48-17	4	E	F	I	MTJH	L42	L48
20191217	L42_L48	L42_L48-17	4	F	F	I	MTJH	L42	L48
20191217	L42_L48	L42_L48-17	4	G	F	I	MTJH	L42	L48
20191217	L42_L48	L42_L48-17	4	H	F	I	MTJH	L42	L48
20191217	L42_L48	L42_L48-17	5	A	M	I	MTJH	L42	L48
20191217	L42_L48	L42_L48-17	5	B	M	I	MTJH	L42	L48
20191217	L42_L48	L42_L48-17	5	C	M	I	MTJH	L42	L48
20191217	L42_L48	L42_L48-17	5	D	M	I	MTJH	L42	L48
20191217	L42_L48	L42_L48-17	5	E	M	I	MTJH	L42	L48
20191217	L42_L48	L42_L48-21	5	F	F	I	MTJH	L42	L48
20191217	L42_L48	L42_L48-21	5	G	F	I	MTJH	L42	L48
20191217	L42_L48	L42_L48-21	5	H	F	I	MTJH	L42	L48
20191217	L42_L48	L42_L48-21	6	A	F	I	MTJH	L42	L48
20191217	L42_L48	L42_L48-21	6	B	F	I	MTJH	L42	L48
20191217	L42_L48	L42_L48-21	6	C	M	I	MTJH	L42	L48
20191217	L42_L48	L42_L48-21	6	D	M	I	MTJH	L42	L48
20191217	L42_L48	L42_L48-21	6	E	M	I	MTJH	L42	L48
20191217	L42_L48	L42_L48-21	6	F	M	I	MTJH	L42	L48
20191217	L42_L48	L42_L48-21	6	G	M	I	MTJH	L42	L48
20191217	L42_L48	L42_L48-23	6	H	F	I	MTJH	L42	L48
20191217	L42_L48	L42_L48-23	7	A	F	I	MTJH	L42	L48
20191217	L42_L48	L42_L48-23	7	B	F	I	MTJH	L42	L48
20191217	L42_L48	L42_L48-23	7	C	F	I	MTJH	L42	L48
20191217	L42_L48	L42_L48-23	7	D	F	I	MTJH	L42	L48
20191217	L42_L48	L42_L48-23	7	E	M	I	MTJH	L42	L48
20191217	L42_L48	L42_L48-23	7	F	M	I	MTJH	L42	L48
20191217	L42_L48	L42_L48-23	7	G	M	I	MTJH	L42	L48
20191217	L42_L48	L42_L48-23	7	H	M	I	MTJH	L42	L48
20191217	L42_L48	L42_L48-23	8	A	M	I	MTJH	L42	L48
20191217	L42_L48	L42_L48-25	8	B	F	I	MTJH	L42	L48
20191217	L42_L48	L42_L48-25	8	C	F	I	MTJH	L42	L48
20191217	L42_L48	L42_L48-25	8	D	F	I	MTJH	L42	L48
20191217	L42_L48	L42_L48-25	8	E	F	I	MTJH	L42	L48
20191217	L42_L48	L42_L48-25	8	F	F	I	MTJH	L42	L48
20191217	L42_L48	L42_L48-25	8	G	M	I	MTJH	L42	L48
20191217	L42_L48	L42_L48-25	8	H	M	I	MTJH	L42	L48
20191217	L42_L48	L42_L48-25	9	A	M	I	MTJH	L42	L48
20191217	L42_L48	L42_L48-25	9	B	M	I	MTJH	L42	L48
20191217	L42_L48	L42_L48-25	9	C	M	I	MTJH	L42	L48
20191217	L42_L48	L42_L48-26	9	D	F	I	MTJH	L42	L48
20191217	L42_L48	L42_L48-26	9	E	F	I	MTJH	L42	L48
20191217	L42_L48	L42_L48-26	9	F	F	I	MTJH	L42	L48
20191217	L42_L48	L42_L48-26	9	G	F	I	MTJH	L42	L48
20191217	L42_L48	L42_L48-26	9	H	F	I	MTJH	L42	L48
20191217	L42_L48	L42_L48-26	10	A	M	I	MTJH	L42	L48
20191217	L42_L48	L42_L48-26	10	B	M	I	MTJH	L42	L48
20191217	L42_L48	L42_L48-26	10	C	M	I	MTJH	L42	L48
20191217	L42_L48	L42_L48-26	10	D	M	I	MTJH	L42	L48
20191217	L42_L48	L42_L48-26	10	E	M	I	MTJH	L42	L48
20191217	L42_L48	L42_L48-29	10	F	F	I	MTJH	L42	L48
20191217	L42_L48	L42_L48-29	10	G	F	I	MTJH	L42	L48
20191217	L42_L48	L42_L48-29	10	H	F	I	MTJH	L42	L48
20191217	L42_L48	L42_L48-29	11	A	F	I	MTJH	L42	L48
20191217	L42_L48	L42_L48-29	11	B	F	I	MTJH	L42	L48
20191217	L42_L48	L42_L48-29	11	C	M	I	MTJH	L42	L48
20191217	L42_L48	L42_L48-29	11	D	M	I	MTJH	L42	L48
20191217	L42_L48	L42_L48-29	11	E	M	I	MTJH	L42	L48
20191217	L42_L48	L42_L48-29	11	F	M	I	MTJH	L42	L48
20191217	L42_L48	L42_L48-29	11	G	M	I	MTJH	L42	L48
20191217	L42_L48	L42_L48-30	11	H	F	I	MTJH	L42	L48
20191217	L42_L48	L42_L48-30	12	A	F	I	MTJH	L42	L48
20191217	L42_L48	L42_L48-30	12	B	M	I	MTJH	L42	L48
20191217	L42_L48	L42_L48-30	12	C	M	I	MTJH	L42	L48
20191217	L42_L48	L42_L48-30	12	D	M	I	MTJH	L42	L48
20191217	L42_L48	L42_L48-30	12	E	M	I	MTJH	L42	L48
20191218	L42	L42-38	1	A	M	I	PHN	L42	L42
20191218	L42	L42-38	2	A	M	I	PHN	L42	L42
20191218	L42	L42-38	3	A	M	I	PHN	L42	L42
20191218	L42	L42-38	4	A	M	I	PHN	L42	L42
20191218	L42	L42-38	5	A	F	I	PHN	L42	L42
20191218	L42	L42-38	6	A	F	I	PHN	L42	L42
20191218	L42	L42-38	7	A	F	I	PHN	L42	L42
20191218	L42	L42-50	8	A	M	I	PHN	L42	L42
20191218	L42	L42-50	9	A	M	I	PHN	L42	L42
20191218	L42	L42-50	10	A	M	I	PHN	L42	L42
20191218	L42	L42-50	11	A	M	I	PHN	L42	L42
20191218	L42	L42-50	12	A	F	U	PHN	L42	L42
20191218	L42	L42-50	1	B	F	I	PHN	L42	L42
20191218	L42	L42-50	2	B	F	I	PHN	L42	L42
20191218	L42	L42-19	3	B	M	I	PHN	L42	L42
20191218	L42	L42-19	4	B	M	I	PHN	L42	L42
20191218	L42	L42-19	5	B	M	I	PHN	L42	L42
20191218	L42	L42-19	6	B	M	I	PHN	L42	L42
20191218	L42	L42-19	7	B	M	I	PHN	L42	L42
20191218	L42	L42-19	8	B	M	I	PHN	L42	L42
20191218	L42	L42-19	9	B	F	I	PHN	L42	L42
20191218	L42	L42-19	10	B	F	I	PHN	L42	L42
20191218	L42	L42-19	11	B	F	I	PHN	L42	L42
20191218	L42	L42-19	12	B	F	I	PHN	L42	L42
20191218	L42	L42-20	1	C	M	I	PHN	L42	L42
20191218	L42	L42-20	2	C	M	I	PHN	L42	L42
20191218	L42	L42-20	3	C	M	I	PHN	L42	L42
20191218	L42	L42-20	4	C	M	I	PHN	L42	L42
20191218	L42	L42-20	5	C	F	I	PHN	L42	L42
20191218	L42	L42-20	6	C	F	I	PHN	L42	L42
20191218	L42	L42-20	7	C	F	I	PHN	L42	L42
20191218	L42	L42-20	8	C	F	I	PHN	L42	L42
20191218	L42	L42-20	9	C	F	I	PHN	L42	L42
20191218	L42	L42-20	10	C	F	I	PHN	L42	L42
20191218	L42	L42-28	11	C	M	I	PHN	L42	L42
20191218	L42	L42-28	12	C	M	I	PHN	L42	L42
20191218	L42	L42-28	1	D	M	I	PHN	L42	L42
20191218	L42	L42-28	2	D	F	I	PHN	L42	L42
20191218	L42	L42-28	3	D	F	I	PHN	L42	L42
20191218	L42	L42-28	4	D	F	I	PHN	L42	L42
20191218	L42	L42-28	5	D	F	I	PHN	L42	L42
20191218	L42	L42-28	6	D	F	I	PHN	L42	L42
20191218	L42	L42-28	7	D	F	I	PHN	L42	L42
20191218	L42	L42-28	8	D	F	I	PHN	L42	L42
20191218	L48	L48-1	9	D	M	I	PHN	L48	L48
20191218	L48	L48-1	10	D	M	I	PHN	L48	L48
20191218	L48	L48-1	11	D	M	I	PHN	L48	L48
20191218	L48	L48-1	12	D	M	I	PHN	L48	L48
20191218	L48	L48-1	1	E	M	I	PHN	L48	L48
20191218	L48	L48-1	2	E	F	I	PHN	L48	L48
20191218	L48	L48-1	3	E	F	I	PHN	L48	L48
20191218	L48	L48-1	4	E	F	I	PHN	L48	L48
20191218	L48	L48-1	5	E	F	I	PHN	L48	L48
20191218	L48	L48-1	6	E	F	I	PHN	L48	L48
20191218	L48	L48-2	7	E	M	I	PHN	L48	L48
20191218	L48	L48-2	8	E	M	I	PHN	L48	L48
20191218	L48	L48-2	9	E	M	I	PHN	L48	L48
20191218	L48	L48-2	10	E	M	I	PHN	L48	L48
20191218	L48	L48-2	11	E	M	I	PHN	L48	L48
20191218	L48	L48-2	12	E	F	I	PHN	L48	L48
20191218	L48	L48-2	1	F	F	I	PHN	L48	L48
20191218	L48	L48-2	2	F	F	I	PHN	L48	L48
20191218	L48	L48-2	3	F	F	I	PHN	L48	L48
20191218	L48	L48-2	4	F	F	I	PHN	L48	L48
20191218	L48	L48-3	5	F	M	I	PHN	L48	L48
20191218	L48	L48-3	6	F	M	I	PHN	L48	L48
20191218	L48	L48-3	7	F	M	I	PHN	L48	L48
20191218	L48	L48-3	8	F	F	I	PHN	L48	L48
20191218	L48	L48-3	9	F	F	I	PHN	L48	L48
20191218	L48	L48-3	10	F	F	I	PHN	L48	L48
20191218	L48	L48-3	11	F	F	I	PHN	L48	L48
20191218	L48	L48-3	12	F	F	I	PHN	L48	L48
20191218	L48	L48-3	1	G	F	I	PHN	L48	L48
20191218	L48	L48-47	2	G	M	I	PHN	L48	L48
20191218	L48	L48-47	3	G	M	I	PHN	L48	L48
20191218	L48	L48-47	4	G	M	I	PHN	L48	L48
20191218	L48	L48-47	5	G	M	I	PHN	L48	L48
20191218	L48	L48-47	6	G	M	I	PHN	L48	L48
20191218	L48	L48-47	7	G	F	I	PHN	L48	L48
20191218	L48	L48-47	8	G	F	I	PHN	L48	L48
20191218	L48	L48-47	9	G	F	I	PHN	L48	L48
20191218	L48	L48-47	10	G	F	I	PHN	L48	L48
20191218	L48	L48-47	11	G	F	I	PHN	L48	L48
20191218	L48	L48-49	12	G	M	I	PHN	L48	L48
20191218	L48	L48-49	1	H	M	I	PHN	L48	L48
20191218	L48	L48-49	2	H	M	I	PHN	L48	L48
20191218	L48	L48-49	3	H	M	I	PHN	L48	L48
20191218	L48	L48-49	4	H	M	I	PHN	L48	L48
20191218	L48	L48-49	5	H	F	I	PHN	L48	L48
20191218	L48	L48-49	6	H	F	I	PHN	L48	L48
20191218	L48	L48-49	7	H	F	I	PHN	L48	L48
20191218	L48	L48-49	8	H	F	I	PHN	L48	L48
20191218	L48	L48-49	9	H	F	I	PHN	L48	L48
20191218	L42_L48	L42_L48-30	1	A	F	I	MTJH	L42	L48
20191218	L42_L48	L42_L48-30	1	B	F	I	MTJH	L42	L48
20191218	L42_L48	L42_L48-30	1	C	F	I	MTJH	L42	L48
20191218	L42_L48	L42_L48-30	1	D	M	I	MTJH	L42	L48
20191218	L42_L48	L42_L48-31	1	E	F	I	MTJH	L42	L48
20191218	L42_L48	L42_L48-31	1	F	F	I	MTJH	L42	L48
20191218	L42_L48	L42_L48-31	1	G	F	I	MTJH	L42	L48
20191218	L42_L48	L42_L48-31	1	H	F	I	MTJH	L42	L48
20191218	L42_L48	L42_L48-31	2	A	F	I	MTJH	L42	L48
20191218	L42_L48	L42_L48-31	2	B	M	I	MTJH	L42	L48
20191218	L42_L48	L42_L48-31	2	C	M	I	MTJH	L42	L48
20191218	L42_L48	L42_L48-31	2	D	M	I	MTJH	L42	L48
20191218	L42_L48	L42_L48-31	2	E	M	U	MTJH	L42	L48
20191218	L42_L48	L42_L48-31	2	F	M	I	MTJH	L42	L48
20191218	L48_L42	L48_L42-1	2	G	F	I	MTJH	L48	L42
20191218	L48_L42	L48_L42-1	2	H	F	I	MTJH	L48	L42
20191218	L48_L42	L48_L42-1	3	A	F	I	MTJH	L48	L42
20191218	L48_L42	L48_L42-1	3	B	F	I	MTJH	L48	L42
20191218	L48_L42	L48_L42-1	3	C	F	I	MTJH	L48	L42
20191218	L48_L42	L48_L42-1	3	D	M	I	MTJH	L48	L42
20191218	L48_L42	L48_L42-1	3	E	M	I	MTJH	L48	L42
20191218	L48_L42	L48_L42-1	3	F	M	I	MTJH	L48	L42
20191218	L48_L42	L48_L42-1	3	G	M	I	MTJH	L48	L42
20191218	L48_L42	L48_L42-1	3	H	M	I	MTJH	L48	L42
20191218	L48_L42	L48_L42-2	4	A	F	I	MTJH	L48	L42
20191218	L48_L42	L48_L42-2	4	B	F	I	MTJH	L48	L42
20191218	L48_L42	L48_L42-2	4	C	F	I	MTJH	L48	L42
20191218	L48_L42	L48_L42-2	4	D	F	I	MTJH	L48	L42
20191218	L48_L42	L48_L42-2	4	E	F	I	MTJH	L48	L42
20191218	L48_L42	L48_L42-2	4	F	M	I	MTJH	L48	L42
20191218	L48_L42	L48_L42-2	4	G	M	I	MTJH	L48	L42
20191218	L48_L42	L48_L42-2	4	H	M	I	MTJH	L48	L42
20191218	L48_L42	L48_L42-2	5	A	M	I	MTJH	L48	L42
20191218	L48_L42	L48_L42-2	5	B	M	I	MTJH	L48	L42
20191218	L48_L42	L48_L42-3	5	C	F	I	MTJH	L48	L42
20191218	L48_L42	L48_L42-3	5	D	F	I	MTJH	L48	L42
20191218	L48_L42	L48_L42-3	5	E	F	I	MTJH	L48	L42
20191218	L48_L42	L48_L42-3	5	F	F	I	MTJH	L48	L42
20191218	L48_L42	L48_L42-3	5	G	F	I	MTJH	L48	L42
20191218	L48_L42	L48_L42-3	5	H	M	I	MTJH	L48	L42
20191218	L48_L42	L48_L42-3	6	A	M	I	MTJH	L48	L42
20191218	L48_L42	L48_L42-3	6	B	M	I	MTJH	L48	L42
20191218	L48_L42	L48_L42-3	6	C	M	I	MTJH	L48	L42
20191218	L48_L42	L48_L42-3	6	D	M	I	MTJH	L48	L42
20191218	L48_L42	L48_L42-4	6	E	F	I	MTJH	L48	L42
20191218	L48_L42	L48_L42-4	6	F	F	I	MTJH	L48	L42
20191218	L48_L42	L48_L42-4	6	G	F	I	MTJH	L48	L42
20191218	L48_L42	L48_L42-4	6	H	F	I	MTJH	L48	L42
20191218	L48_L42	L48_L42-4	7	A	F	I	MTJH	L48	L42
20191218	L48_L42	L48_L42-4	7	B	M	I	MTJH	L48	L42
20191218	L48_L42	L48_L42-4	7	C	M	I	MTJH	L48	L42
20191218	L48_L42	L48_L42-4	7	D	M	I	MTJH	L48	L42
20191218	L48_L42	L48_L42-4	7	E	M	I	MTJH	L48	L42
20191218	L48_L42	L48_L42-4	7	F	M	I	MTJH	L48	L42
20191218	L48_L42	L48_L42-6	7	G	F	I	MTJH	L48	L42
20191218	L48_L42	L48_L42-6	7	H	F	I	MTJH	L48	L42
20191218	L48_L42	L48_L42-6	8	A	F	I	MTJH	L48	L42
20191218	L48_L42	L48_L42-6	8	B	F	I	MTJH	L48	L42
20191218	L48_L42	L48_L42-6	8	C	F	I	MTJH	L48	L42
20191218	L48_L42	L48_L42-6	8	D	M	I	MTJH	L48	L42
20191218	L48_L42	L48_L42-6	8	E	M	I	MTJH	L48	L42
20191218	L48_L42	L48_L42-6	8	F	M	I	MTJH	L48	L42
20191218	L48_L42	L48_L42-6	8	G	M	I	MTJH	L48	L42
20191218	L48_L42	L48_L42-6	8	H	M	I	MTJH	L48	L42
20191218	L48_L42	L48_L42-9	9	A	F	I	MTJH	L48	L42
20191218	L48_L42	L48_L42-9	9	B	F	I	MTJH	L48	L42
20191218	L48_L42	L48_L42-9	9	C	F	I	MTJH	L48	L42
20191218	L48_L42	L48_L42-9	9	D	F	I	MTJH	L48	L42
20191218	L48_L42	L48_L42-9	9	E	F	I	MTJH	L48	L42
20191218	L48_L42	L48_L42-9	9	F	M	I	MTJH	L48	L42
20191218	L48_L42	L48_L42-9	9	G	M	I	MTJH	L48	L42
20191218	L48_L42	L48_L42-9	9	H	M	I	MTJH	L48	L42
20191218	L48_L42	L48_L42-9	10	A	M	I	MTJH	L48	L42
20191218	L48_L42	L48_L42-10	10	B	F	I	MTJH	L48	L42
20191218	L48_L42	L48_L42-10	10	C	F	I	MTJH	L48	L42
20191218	L48_L42	L48_L42-10	10	D	F	I	MTJH	L48	L42
20191218	L48_L42	L48_L42-10	10	E	F	I	MTJH	L48	L42
20191218	L48_L42	L48_L42-10	10	F	F	I	MTJH	L48	L42
20191218	L48_L42	L48_L42-10	10	G	M	I	MTJH	L48	L42
20191218	L48_L42	L48_L42-10	10	H	M	I	MTJH	L48	L42
20191218	L48_L42	L48_L42-10	11	A	M	I	MTJH	L48	L42
20191218	L48_L42	L48_L42-10	11	B	M	I	MTJH	L48	L42
20191218	L48_L42	L48_L42-10	11	C	M	I	MTJH	L48	L42
20191218	L48_L42	L48_L42-12	11	D	F	I	MTJH	L48	L42
20191218	L48_L42	L48_L42-12	11	E	F	I	MTJH	L48	L42
20191218	L48_L42	L48_L42-12	11	F	F	I	MTJH	L48	L42
20191218	L48_L42	L48_L42-12	11	G	F	I	MTJH	L48	L42
20191218	L48_L42	L48_L42-12	11	H	F	I	MTJH	L48	L42
20191218	L48_L42	L48_L42-12	12	A	M	I	MTJH	L48	L42
20191218	L48_L42	L48_L42-12	12	B	M	I	MTJH	L48	L42
20191218	L48_L42	L48_L42-12	12	C	M	I	MTJH	L48	L42
20191218	L48_L42	L48_L42-12	12	D	M	I	MTJH	L48	L42
20191218	L48_L42	L48_L42-12	12	E	M	I	MTJH	L48	L42
20191219	L48_L42	L48_L42-14	1	A	F	I	MTJH	L48	L42
20191219	L48_L42	L48_L42-14	1	B	F	I	MTJH	L48	L42
20191219	L48_L42	L48_L42-14	1	C	F	I	MTJH	L48	L42
20191219	L48_L42	L48_L42-14	1	D	F	I	MTJH	L48	L42
20191219	L48_L42	L48_L42-14	1	E	F	I	MTJH	L48	L42
20191219	L48_L42	L48_L42-14	1	F	M	I	MTJH	L48	L42
20191219	L48_L42	L48_L42-14	1	G	M	I	MTJH	L48	L42
20191219	L48_L42	L48_L42-14	1	H	M	I	MTJH	L48	L42
20191219	L48_L42	L48_L42-14	2	A	M	I	MTJH	L48	L42
20191219	L48_L42	L48_L42-14	2	B	M	I	MTJH	L48	L42
20191219	L48_L42	L48_L42-21	2	C	F	I	MTJH	L48	L42
20191219	L48_L42	L48_L42-21	2	D	F	I	MTJH	L48	L42
20191219	L48_L42	L48_L42-21	2	E	F	I	MTJH	L48	L42
20191219	L48_L42	L48_L42-21	2	F	F	I	MTJH	L48	L42
20191219	L48_L42	L48_L42-21	2	G	F	I	MTJH	L48	L42
20191219	L48_L42	L48_L42-21	2	H	M	I	MTJH	L48	L42
20191219	L48_L42	L48_L42-21	3	A	M	I	MTJH	L48	L42
20191219	L48_L42	L48_L42-21	3	B	M	I	MTJH	L48	L42
20191219	L48_L42	L48_L42-21	3	C	M	I	MTJH	L48	L42
20191219	L48_L42	L48_L42-21	3	D	M	I	MTJH	L48	L42
20191219	L48_L42	L48_L42-22	3	E	F	U	MTJH	L48	L42
20191219	L48_L42	L48_L42-22	3	F	F	I	MTJH	L48	L42
20191219	L48_L42	L48_L42-22	3	G	F	I	MTJH	L48	L42
20191219	L48_L42	L48_L42-22	3	H	F	I	MTJH	L48	L42
20191219	L48_L42	L48_L42-22	4	A	F	I	MTJH	L48	L42
20191219	L48_L42	L48_L42-22	4	B	M	I	MTJH	L48	L42
20191219	L48_L42	L48_L42-22	4	C	M	I	MTJH	L48	L42
20191219	L48_L42	L48_L42-22	4	D	M	I	MTJH	L48	L42
20191219	L48_L42	L48_L42-22	4	E	M	I	MTJH	L48	L42
20191219	L48_L42	L48_L42-22	4	F	M	I	MTJH	L48	L42
20191219	L48_L42	L48_L42-27	4	G	F	I	MTJH	L48	L42
20191219	L48_L42	L48_L42-27	4	H	F	I	MTJH	L48	L42
20191219	L48_L42	L48_L42-27	5	A	F	I	MTJH	L48	L42
20191219	L48_L42	L48_L42-27	5	B	F	I	MTJH	L48	L42
20191219	L48_L42	L48_L42-27	5	C	F	I	MTJH	L48	L42
20191219	L48_L42	L48_L42-27	5	D	M	I	MTJH	L48	L42
20191219	L48_L42	L48_L42-27	5	E	M	I	MTJH	L48	L42
20191219	L48_L42	L48_L42-27	5	F	M	I	MTJH	L48	L42
20191219	L48_L42	L48_L42-27	5	G	M	I	MTJH	L48	L42
20191219	L48_L42	L48_L42-27	5	H	M	I	MTJH	L48	L42
20191219	L48_L42	L48_L42-30	6	A	F	I	MTJH	L48	L42
20191219	L48_L42	L48_L42-30	6	B	F	I	MTJH	L48	L42
20191219	L48_L42	L48_L42-30	6	C	F	I	MTJH	L48	L42
20191219	L48_L42	L48_L42-30	6	D	F	I	MTJH	L48	L42
20191219	L48_L42	L48_L42-30	6	E	F	I	MTJH	L48	L42
20191219	L48_L42	L48_L42-30	6	F	M	I	MTJH	L48	L42
20191219	L48_L42	L48_L42-30	6	G	M	I	MTJH	L48	L42
20191219	L48_L42	L48_L42-30	6	H	M	I	MTJH	L48	L42
20191219	L48_L42	L48_L42-30	7	A	M	I	MTJH	L48	L42
20191219	L48_L42	L48_L42-30	7	B	M	I	MTJH	L48	L42
20191219	L48_L42	L48_L42-31	7	C	F	U	MTJH	L48	L42
20191219	L48_L42	L48_L42-31	7	D	F	I	MTJH	L48	L42
20191219	L48_L42	L48_L42-31	7	E	F	I	MTJH	L48	L42
20191219	L48_L42	L48_L42-31	7	F	F	I	MTJH	L48	L42
20191219	L48_L42	L48_L42-31	7	G	F	I	MTJH	L48	L42
20191219	L48_L42	L48_L42-31	7	H	M	I	MTJH	L48	L42
20191219	L48_L42	L48_L42-31	8	A	M	I	MTJH	L48	L42
20191219	L48_L42	L48_L42-31	8	B	M	I	MTJH	L48	L42
20191219	L48_L42	L48_L42-31	8	C	M	I	MTJH	L48	L42
20191219	L48_L42	L48_L42-31	8	D	M	I	MTJH	L48	L42
20191219	L48_L42	L48_L42-34	8	E	F	I	MTJH	L48	L42
20191219	L48_L42	L48_L42-34	8	F	F	I	MTJH	L48	L42
20191219	L48_L42	L48_L42-34	8	G	F	I	MTJH	L48	L42
20191219	L48_L42	L48_L42-34	8	H	F	I	MTJH	L48	L42
20191219	L48_L42	L48_L42-34	9	A	F	I	MTJH	L48	L42
20191219	L48_L42	L48_L42-34	9	B	M	I	MTJH	L48	L42
20191219	L48_L42	L48_L42-34	9	C	M	I	MTJH	L48	L42
20191219	L48_L42	L48_L42-34	9	D	M	I	MTJH	L48	L42
20191219	L48_L42	L48_L42-34	9	E	M	I	MTJH	L48	L42
20191219	L48_L42	L48_L42-34	9	F	M	I	MTJH	L48	L42
20191219	L48_L42	L48_L42-36	9	G	F	I	MTJH	L48	L42
20191219	L48_L42	L48_L42-36	9	H	F	I	MTJH	L48	L42
20191219	L48_L42	L48_L42-36	10	A	F	I	MTJH	L48	L42
20191219	L48_L42	L48_L42-36	10	B	F	I	MTJH	L48	L42
20191219	L48_L42	L48_L42-36	10	C	F	I	MTJH	L48	L42
20191219	L48_L42	L48_L42-36	10	D	M	I	MTJH	L48	L42
20191219	L48_L42	L48_L42-36	10	E	M	I	MTJH	L48	L42
20191219	L48_L42	L48_L42-36	10	F	M	I	MTJH	L48	L42
20191219	L48_L42	L48_L42-36	10	G	M	I	MTJH	L48	L42
20191219	L48_L42	L48_L42-36	10	H	M	I	MTJH	L48	L42
20191219	L48_L42	L48_L42-38	11	A	F	I	MTJH	L48	L42
20191219	L48_L42	L48_L42-38	11	B	F	U	MTJH	L48	L42
20191219	L48_L42	L48_L42-38	11	C	F	I	MTJH	L48	L42
20191219	L48_L42	L48_L42-38	11	D	F	I	MTJH	L48	L42
20191219	L48_L42	L48_L42-38	11	E	M	I	MTJH	L48	L42
20191219	L48_L42	L48_L42-38	11	F	M	I	MTJH	L48	L42
20191219	L48_L42	L48_L42-38	11	G	M	I	MTJH	L48	L42
20191219	L48_L42	L48_L42-38	11	H	M	I	MTJH	L48	L42
20191219	L48_L42	L48_L42-38	12	A	M	I	MTJH	L48	L42
20191219	L48_L42	L48_L42-38	12	B	M	I	MTJH	L48	L42
20191219	L48_L42	L48_L42-39	12	C	F	I	MTJH	L48	L42
20191219	L48_L42	L48_L42-39	12	D	F	I	MTJH	L48	L42
20191219	L48_L42	L48_L42-39	12	E	M	I	MTJH	L48	L42
20191219	L42	L42-3	1	A	F	I	PHN	L42	L42
20191219	L42	L42-3	2	A	F	I	PHN	L42	L42
20191219	L42	L42-3	3	A	F	I	PHN	L42	L42
20191219	L42	L42-3	4	A	F	I	PHN	L42	L42
20191219	L42	L42-3	5	A	F	I	PHN	L42	L42
20191219	L42	L42-3	6	A	M	I	PHN	L42	L42
20191219	L42	L42-3	7	A	M	I	PHN	L42	L42
20191219	L42	L42-3	8	A	M	I	PHN	L42	L42
20191219	L42	L42-3	9	A	M	I	PHN	L42	L42
20191219	L42	L42-3	10	A	M	I	PHN	L42	L42
20191219	L42	L42-8	11	A	F	I	PHN	L42	L42
20191219	L42	L42-8	12	A	F	I	PHN	L42	L42
20191219	L42	L42-8	1	B	F	I	PHN	L42	L42
20191219	L42	L42-8	2	B	F	I	PHN	L42	L42
20191219	L42	L42-8	3	B	F	I	PHN	L42	L42
20191219	L42	L42-8	4	B	F	I	PHN	L42	L42
20191219	L42	L42-8	5	B	F	I	PHN	L42	L42
20191219	L42	L42-8	6	B	M	I	PHN	L42	L42
20191219	L42	L42-8	7	B	M	I	PHN	L42	L42
20191219	L42	L42-8	8	B	M	I	PHN	L42	L42
20191219	L42	L42-9	9	B	F	I	PHN	L42	L42
20191219	L42	L42-9	10	B	F	I	PHN	L42	L42
20191219	L42	L42-9	11	B	F	I	PHN	L42	L42
20191219	L42	L42-9	12	B	F	I	PHN	L42	L42
20191219	L42	L42-9	1	C	F	I	PHN	L42	L42
20191219	L42	L42-9	2	C	M	I	PHN	L42	L42
20191219	L42	L42-9	3	C	M	I	PHN	L42	L42
20191219	L42	L42-9	4	C	M	I	PHN	L42	L42
20191219	L42	L42-9	5	C	M	I	PHN	L42	L42
20191219	L42	L42-9	6	C	M	I	PHN	L42	L42
20191219	L42	L42-13	7	C	F	I	PHN	L42	L42
20191219	L42	L42-13	8	C	F	I	PHN	L42	L42
20191219	L42	L42-13	9	C	F	I	PHN	L42	L42
20191219	L42	L42-13	10	C	F	I	PHN	L42	L42
20191219	L42	L42-13	11	C	F	I	PHN	L42	L42
20191219	L42	L42-13	12	C	F	I	PHN	L42	L42
20191219	L42	L42-13	1	D	F	I	PHN	L42	L42
20191219	L42	L42-13	2	D	F	I	PHN	L42	L42
20191219	L42	L42-13	3	D	F	I	PHN	L42	L42
20191219	L42	L42-13	4	D	M	I	PHN	L42	L42
20191219	L42	L42-18	5	D	F	I	PHN	L42	L42
20191219	L42	L42-18	6	D	F	I	PHN	L42	L42
20191219	L42	L42-18	7	D	F	I	PHN	L42	L42
20191219	L42	L42-18	8	D	F	I	PHN	L42	L42
20191219	L42	L42-18	9	D	F	I	PHN	L42	L42
20191219	L42	L42-18	10	D	M	I	PHN	L42	L42
20191219	L42	L42-18	11	D	M	I	PHN	L42	L42
20191219	L42	L42-18	12	D	M	I	PHN	L42	L42
20191219	L42	L42-18	1	E	M	I	PHN	L42	L42
20191219	L42	L42-18	2	E	M	I	PHN	L42	L42
20191219	L42	L42-23	3	E	F	U	PHN	L42	L42
20191219	L42	L42-23	4	E	F	I	PHN	L42	L42
20191219	L42	L42-23	5	E	F	NA	PHN	L42	L42
20191219	L42	L42-23	6	E	F	I	PHN	L42	L42
20191219	L42	L42-23	7	E	F	I	PHN	L42	L42
20191219	L42	L42-23	8	E	M	I	PHN	L42	L42
20191219	L42	L42-23	9	E	M	I	PHN	L42	L42
20191219	L42	L42-23	10	E	M	I	PHN	L42	L42
20191219	L42	L42-23	11	E	M	I	PHN	L42	L42
20191219	L42	L42-23	12	E	M	I	PHN	L42	L42
20191219	L42	L42-26	1	F	F	I	PHN	L42	L42
20191219	L42	L42-26	2	F	F	I	PHN	L42	L42
20191219	L42	L42-26	3	F	F	I	PHN	L42	L42
20191219	L42	L42-26	4	F	F	U	PHN	L42	L42
20191219	L42	L42-26	5	F	M	NA	PHN	L42	L42
20191219	L42	L42-26	6	F	M	I	PHN	L42	L42
20191219	L42	L42-26	7	F	M	I	PHN	L42	L42
20191219	L42	L42-26	8	F	M	I	PHN	L42	L42
20191219	L42	L42-26	9	F	M	I	PHN	L42	L42
20191219	L42	L42-26	10	F	M	I	PHN	L42	L42
20191219	L42	L42-36	11	F	F	I	PHN	L42	L42
20191219	L42	L42-36	12	F	F	I	PHN	L42	L42
20191219	L42	L42-36	1	G	F	I	PHN	L42	L42
20191219	L42	L42-36	2	G	F	I	PHN	L42	L42
20191219	L42	L42-36	3	G	F	I	PHN	L42	L42
20191219	L42	L42-36	4	G	M	I	PHN	L42	L42
20191219	L42	L42-36	5	G	M	I	PHN	L42	L42
20191219	L42	L42-36	6	G	M	I	PHN	L42	L42
20191219	L42	L42-36	7	G	M	I	PHN	L42	L42
20191219	L42	L42-36	8	G	M	I	PHN	L42	L42
20191219	L42	L42-37	9	G	F	I	PHN	L42	L42
20191219	L42	L42-37	10	G	F	I	PHN	L42	L42
20191219	L42	L42-37	11	G	F	I	PHN	L42	L42
20191219	L42	L42-37	12	G	F	I	PHN	L42	L42
20191219	L42	L42-37	1	H	F	I	PHN	L42	L42
20191219	L42	L42-37	2	H	M	I	PHN	L42	L42
20191219	L42	L42-37	3	H	M	I	PHN	L42	L42
20191219	L42	L42-37	4	H	M	I	PHN	L42	L42
20191219	L42	L42-37	5	H	M	I	PHN	L42	L42
20191219	L42	L42-37	6	H	M	I	PHN	L42	L42
20191219	L42	L42-38	7	H	F	I	PHN	L42	L42
20191219	L42	L42-38	8	H	F	I	PHN	L42	L42
20191219	L42	L42-38	9	H	M	I	PHN	L42	L42
20191228	L48_L42	L48_L42-39	1	A	F	I	MTJH	L48	L42
20191228	L48_L42	L48_L42-39	1	B	F	I	MTJH	L48	L42
20191228	L48_L42	L48_L42-39	1	C	F	U	MTJH	L48	L42
20191228	L48_L42	L48_L42-39	1	D	M	I	MTJH	L48	L42
20191228	L48_L42	L48_L42-39	1	E	M	I	MTJH	L48	L42
20191228	L48_L42	L48_L42-39	1	F	M	I	MTJH	L48	L42
20191228	L48_L42	L48_L42-39	1	G	M	I	MTJH	L48	L42
20191228	L48_L42	L48_L42-41	1	H	F	I	MTJH	L48	L42
20191228	L48_L42	L48_L42-41	2	A	F	I	MTJH	L48	L42
20191228	L48_L42	L48_L42-41	2	B	F	I	MTJH	L48	L42
20191228	L48_L42	L48_L42-41	2	C	F	U	MTJH	L48	L42
20191228	L48_L42	L48_L42-41	2	D	F	I	MTJH	L48	L42
20191228	L48_L42	L48_L42-41	2	E	M	I	MTJH	L48	L42
20191228	L48_L42	L48_L42-41	2	F	M	I	MTJH	L48	L42
20191228	L48_L42	L48_L42-41	2	G	M	I	MTJH	L48	L42
20191228	L48_L42	L48_L42-41	2	H	M	I	MTJH	L48	L42
20191228	L48_L42	L48_L42-41	3	A	M	I	MTJH	L48	L42
20191228	L48_L42	L48_L42-42	3	B	F	I	MTJH	L48	L42
20191228	L48_L42	L48_L42-42	3	C	F	I	MTJH	L48	L42
20191228	L48_L42	L48_L42-42	3	D	F	I	MTJH	L48	L42
20191228	L48_L42	L48_L42-42	3	E	F	I	MTJH	L48	L42
20191228	L48_L42	L48_L42-42	3	F	F	I	MTJH	L48	L42
20191228	L48_L42	L48_L42-42	3	G	M	I	MTJH	L48	L42
20191228	L48_L42	L48_L42-42	3	H	M	I	MTJH	L48	L42
20191228	L48_L42	L48_L42-42	4	A	M	I	MTJH	L48	L42
20191228	L48_L42	L48_L42-42	4	B	M	I	MTJH	L48	L42
20191228	L48_L42	L48_L42-42	4	C	M	I	MTJH	L48	L42
20191228	L48	L48-50	4	D	F	I	MTJH	L48	L48
20191228	L48	L48-50	4	E	F	I	MTJH	L48	L48
20191228	L48	L48-50	4	F	F	I	MTJH	L48	L48
20191228	L48	L48-50	4	G	F	I	MTJH	L48	L48
20191228	L48	L48-50	4	H	F	I	MTJH	L48	L48
20191228	L48	L48-50	5	A	M	I	MTJH	L48	L48
20191228	L48	L48-50	5	B	M	I	MTJH	L48	L48
20191228	L48	L48-50	5	C	M	I	MTJH	L48	L48
20191228	L48	L48-50	5	D	M	I	MTJH	L48	L48
20191228	L48	L48-50	5	E	M	I	MTJH	L48	L48
20191228	L48	L48-5	5	F	F	I	MTJH	L48	L48
20191228	L48	L48-5	5	G	F	I	MTJH	L48	L48
20191228	L48	L48-5	5	H	F	I	MTJH	L48	L48
20191228	L48	L48-5	6	A	F	I	MTJH	L48	L48
20191228	L48	L48-5	6	B	F	I	MTJH	L48	L48
20191228	L48	L48-5	6	C	F	I	MTJH	L48	L48
20191228	L48	L48-5	6	D	M	I	MTJH	L48	L48
20191228	L48	L48-5	6	E	M	U	MTJH	L48	L48
20191228	L48	L48-5	6	F	M	I	MTJH	L48	L48
20191228	L48	L48-5	6	G	M	I	MTJH	L48	L48
20191228	L48	L48-17	6	H	F	I	MTJH	L48	L48
20191228	L48	L48-17	7	A	F	I	MTJH	L48	L48
20191228	L48	L48-17	7	B	F	I	MTJH	L48	L48
20191228	L48	L48-17	7	C	F	I	MTJH	L48	L48
20191228	L48	L48-17	7	D	F	I	MTJH	L48	L48
20191228	L48	L48-17	7	E	M	I	MTJH	L48	L48
20191228	L48	L48-17	7	F	M	I	MTJH	L48	L48
20191228	L48	L48-17	7	G	M	I	MTJH	L48	L48
20191228	L48	L48-17	7	H	M	I	MTJH	L48	L48
20191228	L48	L48-17	8	A	M	I	MTJH	L48	L48
20191228	L48	L48-22	8	B	F	I	MTJH	L48	L48
20191228	L48	L48-22	8	C	F	I	MTJH	L48	L48
20191228	L48	L48-22	8	D	F	I	MTJH	L48	L48
20191228	L48	L48-22	8	E	F	I	MTJH	L48	L48
20191228	L48	L48-22	8	F	F	I	MTJH	L48	L48
20191228	L48	L48-22	8	G	M	I	MTJH	L48	L48
20191228	L48	L48-22	8	H	M	I	MTJH	L48	L48
20191228	L48	L48-22	9	A	M	I	MTJH	L48	L48
20191228	L48	L48-22	9	B	M	I	MTJH	L48	L48
20191228	L48	L48-22	9	C	M	I	MTJH	L48	L48
20191228	L48	L48-28	9	D	F	I	MTJH	L48	L48
20191228	L48	L48-28	9	E	F	I	MTJH	L48	L48
20191228	L48	L48-28	9	F	F	I	MTJH	L48	L48
20191228	L48	L48-28	9	G	F	I	MTJH	L48	L48
20191228	L48	L48-28	9	H	F	I	MTJH	L48	L48
20191228	L48	L48-28	10	A	M	I	MTJH	L48	L48
20191228	L48	L48-28	10	B	M	I	MTJH	L48	L48
20191228	L48	L48-28	10	C	M	I	MTJH	L48	L48
20191228	L48	L48-28	10	D	M	I	MTJH	L48	L48
20191228	L48	L48-28	10	E	M	I	MTJH	L48	L48
20191228	L48	L48-30	10	F	F	I	MTJH	L48	L48
20191228	L48	L48-30	10	G	F	I	MTJH	L48	L48
20191228	L48	L48-30	10	H	F	I	MTJH	L48	L48
20191228	L48	L48-30	11	A	F	I	MTJH	L48	L48
20191228	L48	L48-30	11	B	F	I	MTJH	L48	L48
20191228	L48	L48-30	11	C	F	I	MTJH	L48	L48
20191228	L48	L48-30	11	D	M	I	MTJH	L48	L48
20191228	L48	L48-30	11	E	M	I	MTJH	L48	L48
20191228	L48	L48-30	11	F	M	I	MTJH	L48	L48
20191228	L48	L48-30	11	G	M	I	MTJH	L48	L48
20191228	L48	L48-31	11	H	F	I	MTJH	L48	L48
20191228	L48	L48-31	12	A	F	I	MTJH	L48	L48
20191228	L48	L48-31	12	B	M	I	MTJH	L48	L48
20191228	L48	L48-31	12	C	M	I	MTJH	L48	L48
20191228	L48	L48-31	12	D	M	I	MTJH	L48	L48
20191228	L48	L48-31	12	E	M	I	MTJH	L48	L48
20191229	L48	L48-31	1	A	F	U	MTJH	L48	L48
20191229	L48	L48-31	1	B	F	I	MTJH	L48	L48
20191229	L48	L48-31	1	C	F	I	MTJH	L48	L48
20191229	L48	L48-31	1	D	M	I	MTJH	L48	L48
20191229	L48	L48-36	1	E	F	I	MTJH	L48	L48
20191229	L48	L48-36	1	F	F	I	MTJH	L48	L48
20191229	L48	L48-36	1	G	F	I	MTJH	L48	L48
20191229	L48	L48-36	1	H	F	I	MTJH	L48	L48
20191229	L48	L48-36	2	A	F	I	MTJH	L48	L48
20191229	L48	L48-36	2	B	M	I	MTJH	L48	L48
20191229	L48	L48-36	2	C	M	I	MTJH	L48	L48
20191229	L48	L48-36	2	D	M	I	MTJH	L48	L48
20191229	L48	L48-36	2	E	M	I	MTJH	L48	L48
20191229	L48	L48-36	2	F	M	I	MTJH	L48	L48
20191229	L48	L48-43	2	G	F	I	MTJH	L48	L48
20191229	L48	L48-43	2	H	F	I	MTJH	L48	L48
20191229	L48	L48-43	3	A	F	I	MTJH	L48	L48
20191229	L48	L48-43	3	B	F	I	MTJH	L48	L48
20191229	L48	L48-43	3	C	F	I	MTJH	L48	L48
20191229	L48	L48-43	3	D	M	I	MTJH	L48	L48
20191229	L48	L48-43	3	E	M	I	MTJH	L48	L48
20191229	L48	L48-43	3	F	M	I	MTJH	L48	L48
20191229	L48	L48-43	3	G	M	I	MTJH	L48	L48
20191229	L48	L48-45	3	H	F	I	MTJH	L48	L48
20191229	L48	L48-45	4	A	F	I	MTJH	L48	L48
20191229	L48	L48-45	4	B	F	I	MTJH	L48	L48
20191229	L48	L48-45	4	C	F	I	MTJH	L48	L48
20191229	L48	L48-45	4	D	F	I	MTJH	L48	L48
20191229	L48	L48-45	4	E	F	I	MTJH	L48	L48
20191229	L48	L48-45	4	F	M	I	MTJH	L48	L48
20191229	L48	L48-45	4	G	M	I	MTJH	L48	L48
20191229	L48	L48-45	4	H	M	I	MTJH	L48	L48
20191229	L48	L48-45	5	A	M	I	MTJH	L48	L48
20191229	L48	L48-48	5	B	F	I	MTJH	L48	L48
20191229	L48	L48-48	5	C	F	I	MTJH	L48	L48
20191229	L48	L48-48	5	D	F	I	MTJH	L48	L48
20191229	L48	L48-48	5	E	F	I	MTJH	L48	L48
20191229	L48	L48-48	5	F	F	I	MTJH	L48	L48
20191229	L48	L48-48	5	G	F	I	MTJH	L48	L48
20191229	L48	L48-48	5	H	M	I	MTJH	L48	L48
20191229	L48	L48-48	6	A	M	I	MTJH	L48	L48
20191229	L48	L48-48	6	B	M	I	MTJH	L48	L48
20191229	L48	L48-48	6	C	M	I	MTJH	L48	L48
20191229	L48	L48-4	6	D	F	I	MTJH	L48	L48
20191229	L48	L48-4	6	E	F	I	MTJH	L48	L48
20191229	L48	L48-4	6	F	F	I	MTJH	L48	L48
20191229	L48	L48-4	6	G	F	I	MTJH	L48	L48
20191229	L48	L48-4	6	H	F	I	MTJH	L48	L48
20191229	L48	L48-4	7	A	F	I	MTJH	L48	L48
20191229	L48	L48-4	7	B	F	I	MTJH	L48	L48
20191229	L48	L48-4	7	C	F	I	MTJH	L48	L48
20191229	L48	L48-4	7	D	M	I	MTJH	L48	L48
20191229	L48	L48-8	7	E	F	I	MTJH	L48	L48
20191229	L48	L48-8	7	F	F	I	MTJH	L48	L48
20191229	L48	L48-8	7	G	F	I	MTJH	L48	L48
20191229	L48	L48-8	7	H	F	I	MTJH	L48	L48
20191229	L48	L48-8	8	A	F	I	MTJH	L48	L48
20191229	L48	L48-8	8	B	F	I	MTJH	L48	L48
20191229	L48	L48-8	8	C	M	I	MTJH	L48	L48
20191229	L48	L48-8	8	D	M	I	MTJH	L48	L48
20191229	L48	L48-8	8	E	M	I	MTJH	L48	L48
20191229	L48	L48-8	8	F	M	I	MTJH	L48	L48
20191229	L48	L48-10	8	G	F	I	MTJH	L48	L48
20191229	L48	L48-10	8	H	F	I	MTJH	L48	L48
20191229	L48	L48-10	9	A	M	I	MTJH	L48	L48
20191229	L48	L48-10	9	B	M	I	MTJH	L48	L48
20191229	L48	L48-10	9	C	M	I	MTJH	L48	L48
20191229	L48	L48-10	9	D	M	I	MTJH	L48	L48
20191229	L48	L48-10	9	E	M	I	MTJH	L48	L48
20191229	L48	L48-10	9	F	M	I	MTJH	L48	L48
20191229	L48	L48-10	9	G	M	I	MTJH	L48	L48
20191229	L48	L48-10	9	H	M	I	MTJH	L48	L48
20191229	L48	L48-11	10	A	F	I	MTJH	L48	L48
20191229	L48	L48-11	10	B	F	I	MTJH	L48	L48
20191229	L48	L48-11	10	C	F	I	MTJH	L48	L48
20191229	L48	L48-11	10	D	F	I	MTJH	L48	L48
20191229	L48	L48-11	10	E	M	I	MTJH	L48	L48
20191229	L48	L48-11	10	F	M	I	MTJH	L48	L48
20191229	L48	L48-11	10	G	M	I	MTJH	L48	L48
20191229	L48	L48-11	10	H	M	I	MTJH	L48	L48
20191229	L48	L48-11	11	A	M	I	MTJH	L48	L48
20191229	L48	L48-11	11	B	M	I	MTJH	L48	L48
20191229	L48	L48-23	11	C	F	I	MTJH	L48	L48
20191229	L48	L48-23	11	D	F	I	MTJH	L48	L48
20191229	L48	L48-23	11	E	F	I	MTJH	L48	L48
20191229	L48	L48-23	11	F	F	I	MTJH	L48	L48
20191229	L48	L48-23	11	G	F	I	MTJH	L48	L48
20191229	L48	L48-23	11	H	M	I	MTJH	L48	L48
20191229	L48	L48-23	12	A	M	I	MTJH	L48	L48
20191229	L48	L48-23	12	B	M	I	MTJH	L48	L48
20191229	L48	L48-23	12	C	M	I	MTJH	L48	L48
20191229	L48	L48-23	12	D	M	I	MTJH	L48	L48
